# Supplementary material
Source: publisher figshare collection journal article supplement (https://acs.figshare.com/ndownloader/files/20109086)
Supplement: Supplementary file 1 [file 20109086]

## Supporting Information

### **Propagating DFT Uncertainty to Mechanism Determination, Degree of Rate Control and Coverage Analysis: The Kinetics of Dry Reforming of Methane**

Baochuan Wang,<sup>1,2,3</sup> Shuyue Chen,<sup>1,2,3</sup> Jiaming Zhang,<sup>1</sup> Shenggang Li,<sup>1,2</sup> and Bo Yang\*,<sup>1</sup>

*<sup>1</sup>School of Physical Science and Technology, ShanghaiTech University, 393 Middle Huaxia Road, Shanghai 201210, China*

*<sup>2</sup>CAS Key Laboratory of Low-Carbon Conversion Science & Engineering, Shanghai Advanced Research Institute, CAS, 100 Haik Road, Shanghai 201210, China*

*<sup>3</sup>University of Chinese Academy of Sciences, Beijing 100049, China*

E-mail: [yangbo1@shanghaitech.edu.cn](mailto:yangbo1@shanghaitech.edu.cn)

## 1. Species and elementary defined for DRM and optimized structures

### 1.1 Species defined for DRM

#### Gas:

CO<sub>2</sub>, CO, H<sub>2</sub>, CH<sub>4</sub>

#### Intermediates:

C\*, CH\*, CH<sub>2</sub>\*, CH<sub>2</sub>O\*, CH<sub>2</sub>OH\*, CH<sub>3</sub>\*, CH<sub>3</sub>O\*, CH<sub>3</sub>OH\*, CHO\*, CHOH\*, CO\*, COH\*, COOH\*, H\*, HCOO\*, O\*, OH\*

#### Transition states:

C-H\*, CH<sub>2</sub>-H\*, CH<sub>2</sub>-O\*, CH<sub>2</sub>O-H\*, CH<sub>2</sub>-OH\*, CH<sub>3</sub>-H\*, CH<sub>3</sub>-O\*, CH<sub>3</sub>O-H\*, CH<sub>3</sub>-OH\*, CH-H\*, CH-O\*, CHO-H\*, CH-OH\*, CHO-O\*, C-O\*, CO-H\*, C-OH\*, CO-O\*, CO-OH\*, COO-H\*, H-CH<sub>2</sub>O\*, H-CH<sub>2</sub>OH\*, H-CHO\*, H-CHOH\*, H-CO\*, H-COH\*, H-COO\*, O-H\*

### 1.2 Elementary steps defined in DRM

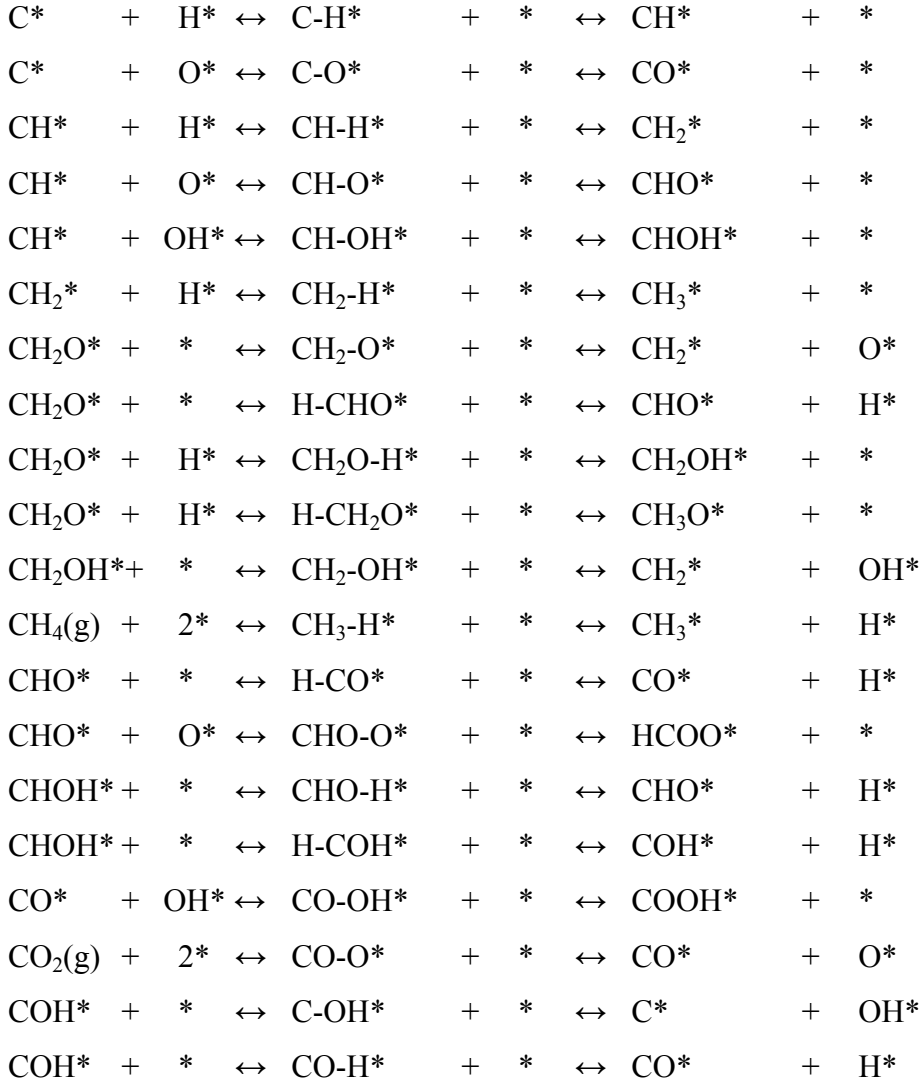

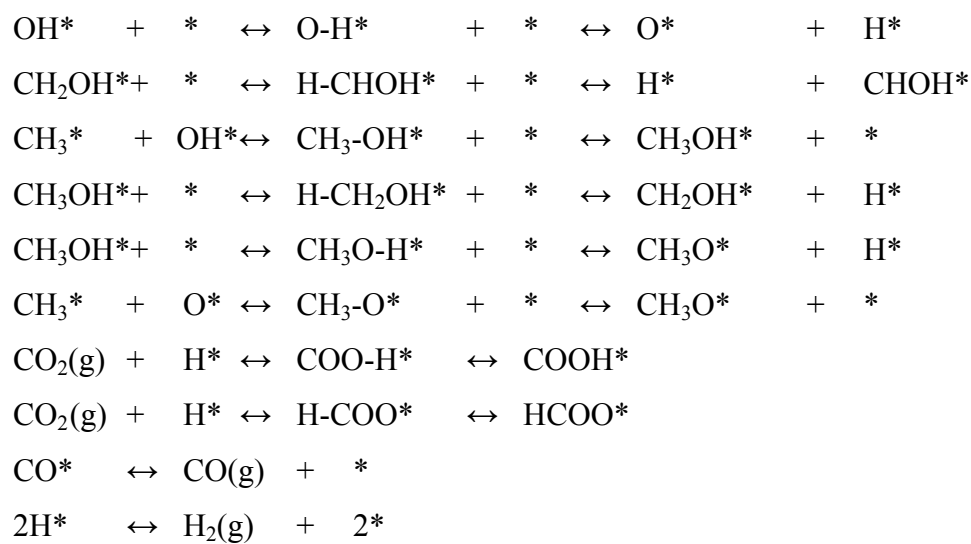

### 1.3 Optimized structures of adsorbates and transition states on Ni(111)

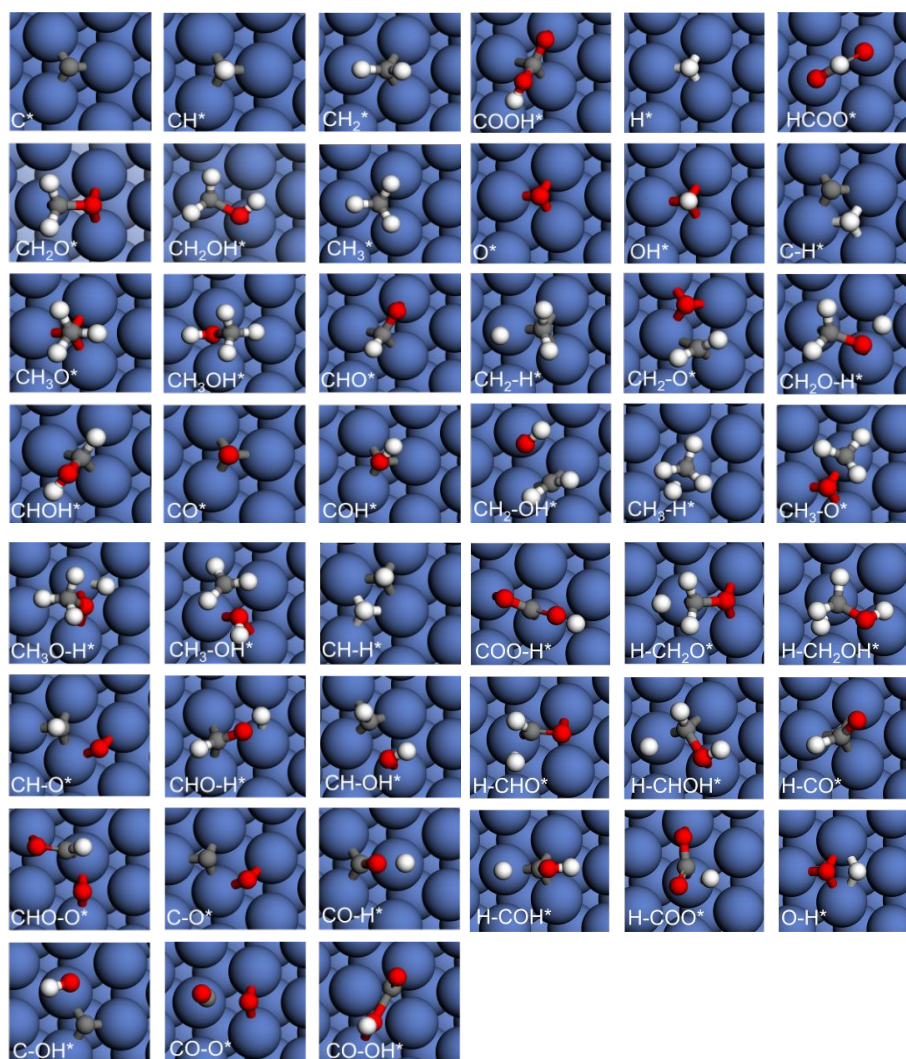

**Figure S1.** Optimized structures of adsorbates and transition states on Ni(111).

#### 1.4 Optimized structures of adsorbates and transition states on Pt(111)

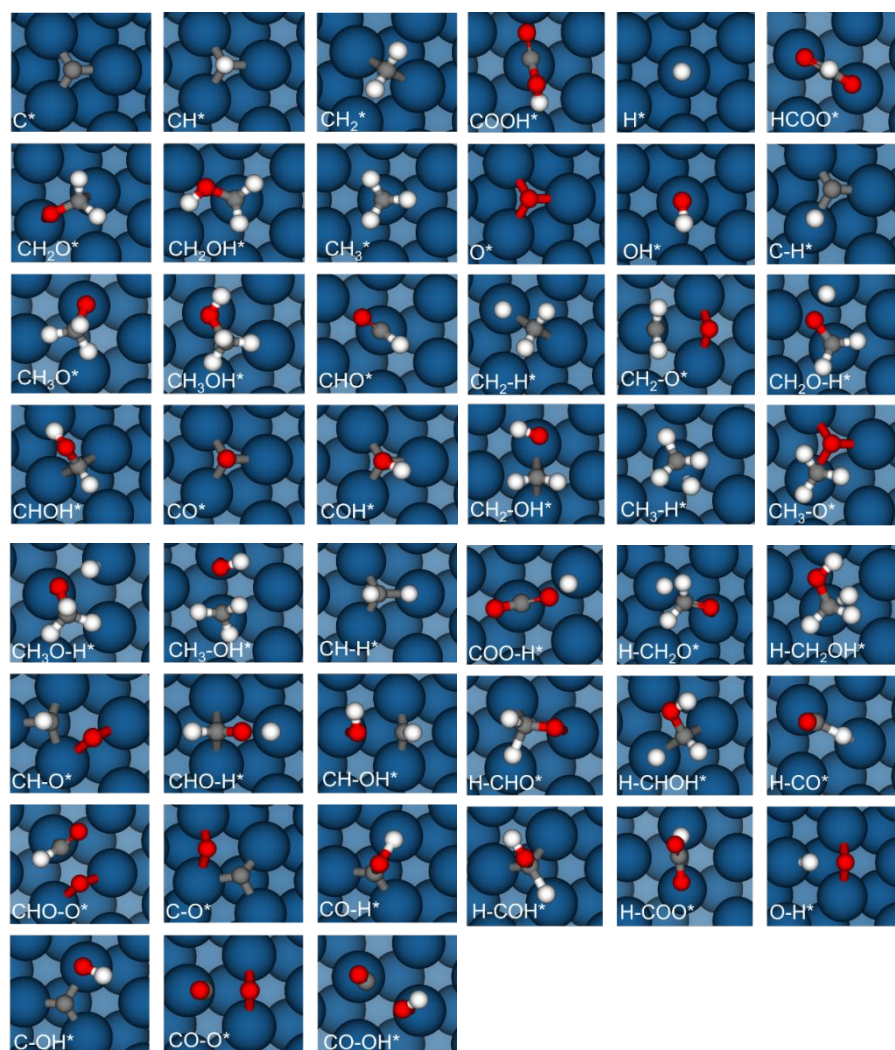

**Figure S2.** Optimized structures of adsorbates and transition states on Pt(111).

## 2. BEEF-vdW ensembles and error estimation

Bayesian error estimation functional with van der Waals correlations (BEEF-vdW) is a semi-empirical exchange correlation functional developed based on several training data sets including molecular formation energies, molecular reaction energies, chemisorption on solid surfaces, molecular reaction barriers, non-covalent interactions, and solid-state properties. The exchange correlation energy in the BEEF-vdW exchange correlation functional is expressed as the sum of the exchange energy under the generalized gradient approximation (GGA) exchange expanded in Legendre polynomials, the local density approximation (LDA) and the PBE correlation energies, and the non-local correlation energy from vdW-DF2, following the equation below

$$E_{XC} = \sum_{m=0}^{M_x-1} a_m E_m^{GGA-x} + \alpha_c E^{LDA-c} + (1 - \alpha_c) E^{PBE-c} + E^{nl-c} \quad (S1)$$

where  $M_x$  represents the degree of the polynomial and  $a_m$  are expansion coefficients. Practically, the parameters  $a_m$  and  $\alpha_c$  in the equation are optimized to obtain the best fit with respect to the training data sets mentioned above. The error estimation ensemble of exchange correlation functionals is generated with a probability distribution function of the parameters, i.e.  $a_m$  and  $\alpha_c$ . Further details can be found from the reference.<sup>1</sup>

The frequency of the transition state of index  $s$  with maximum DRC, denoted as  $F_s$ , can be written as:

$$F_s = \frac{1}{N_f} \sum_{n=1}^{N_f} \delta \left( s - \arg \max_{s' \in S_a} DRC(n, s') \right) \quad (S2)$$

where  $S_a$  is the indexes of all transition states,  $DRC(n, s')$  denotes the DRC of the transition state with index  $s'$ , calculated using the DFT functional with index  $n$ . Arguments of the maxima ( $\arg \max$ ) DRC denotes the index of transition state when its DRC is maximum. Similarly, the frequency of intermediates of index  $c$  with the maximum coverage, denoted as  $F_c$ , can be written as:

$$F_c = \frac{1}{N_f} \sum_{n=1}^{N_f} \delta \left( c - \arg \max_{c' \in C_a} Coverage(n, c') \right) \quad (S3)$$

where  $C_a$  is the indexes of all intermediates,  $Coverage(n, c')$  denotes the coverage of the intermediate with index  $c'$ , calculated using the DFT functional with index  $n$ .

### 3. Details of pruning results

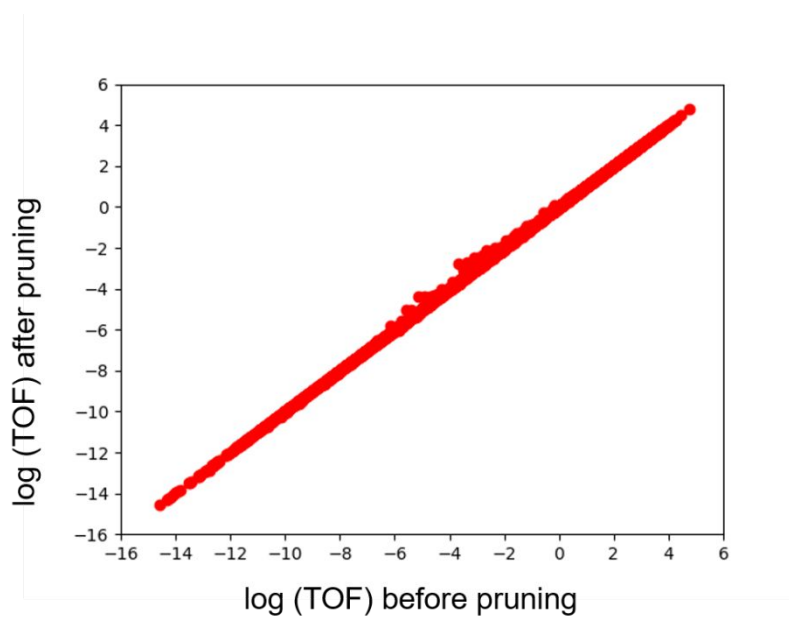

**Figure S3.** Parity plot between the log(TOF) obtained before and after pruning.

### 4. DRC distribution

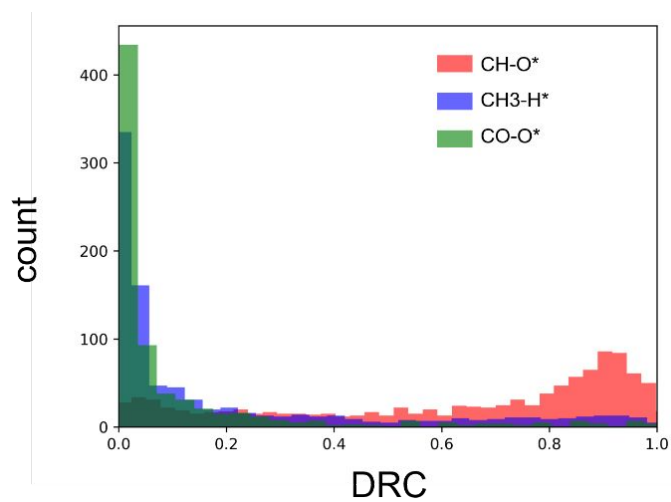

**Figure S4.** Distribution of 3 highest DRC on Ni(111) at 823 K.



## 5. Invalid reaction pathways D, E and F on Ni(111) and Pt(111)

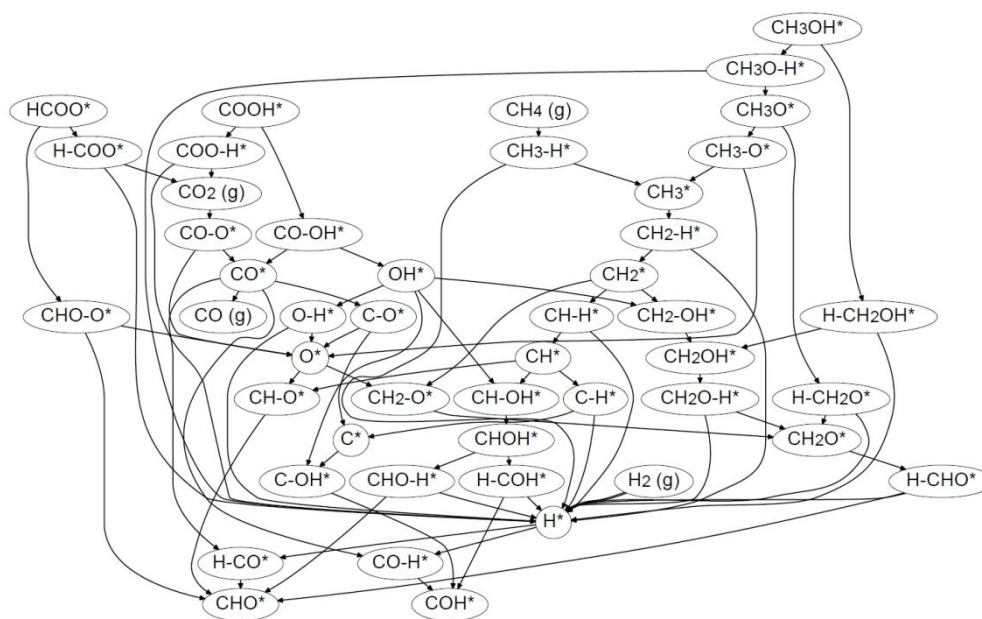

**Path D**

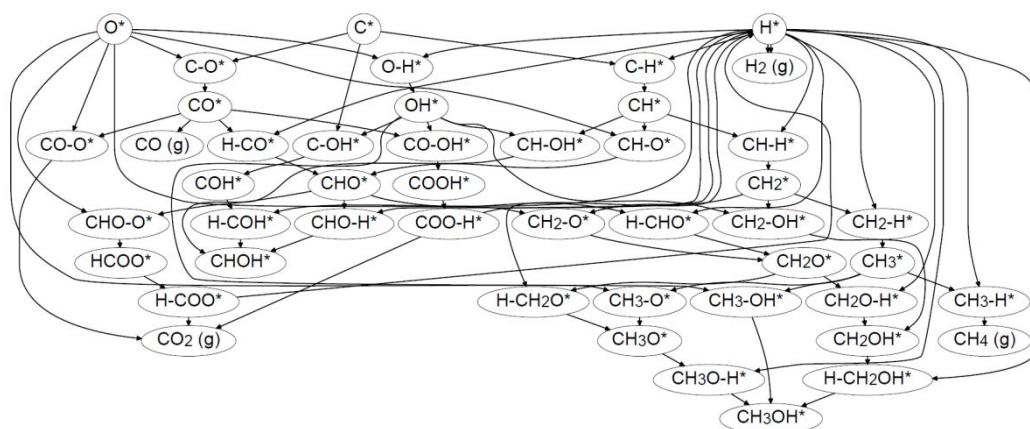

**Path E**



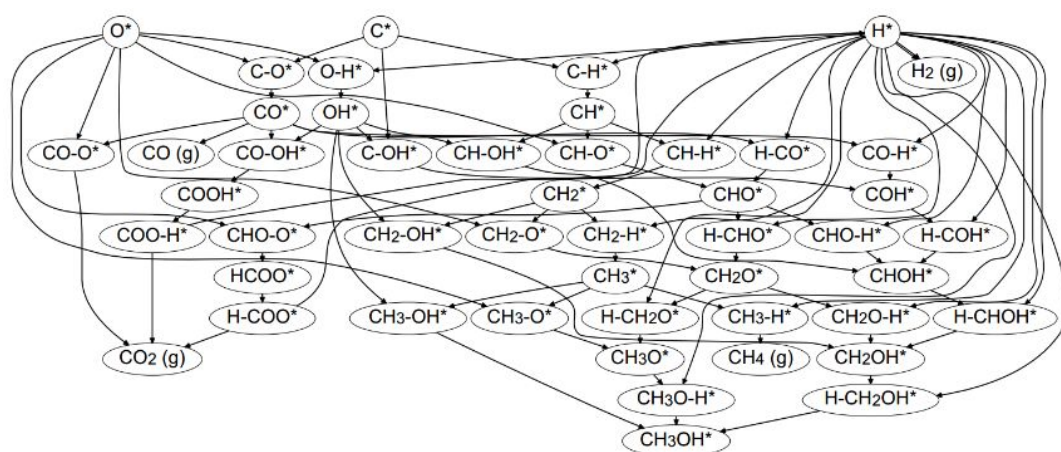

**Path F**

**Figure S5.** Invalid reaction pathways identified with a certain confidence (>9%) on Ni(111) and Pt(111).

## 6. Occurance frequency of species with most negative DRC

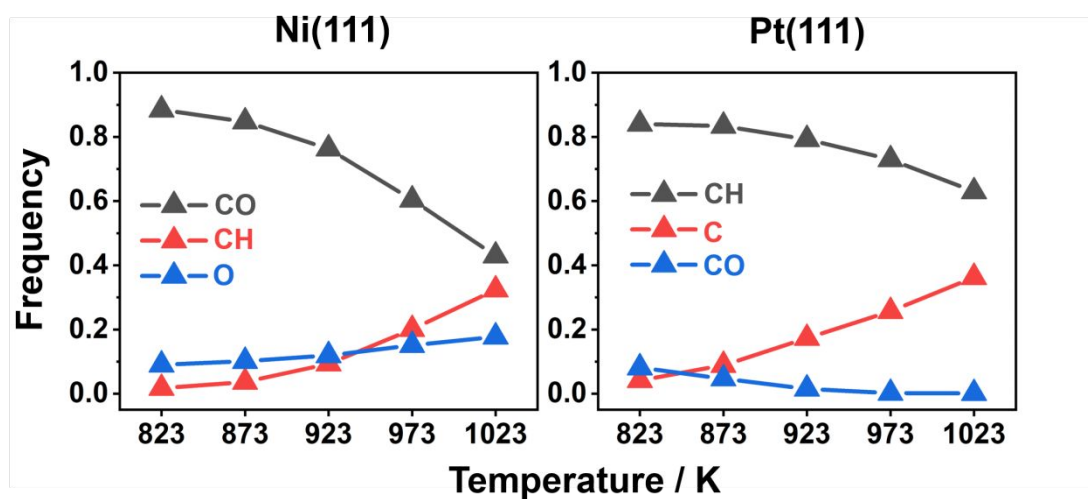

**Figure S6.** Frequency of species with most negative DRC on Ni(111) and Pt(111).

Reaction condition: 923 K, 1 bar, using BEEF-vdw energies on Ni(111).

## Iteration 2

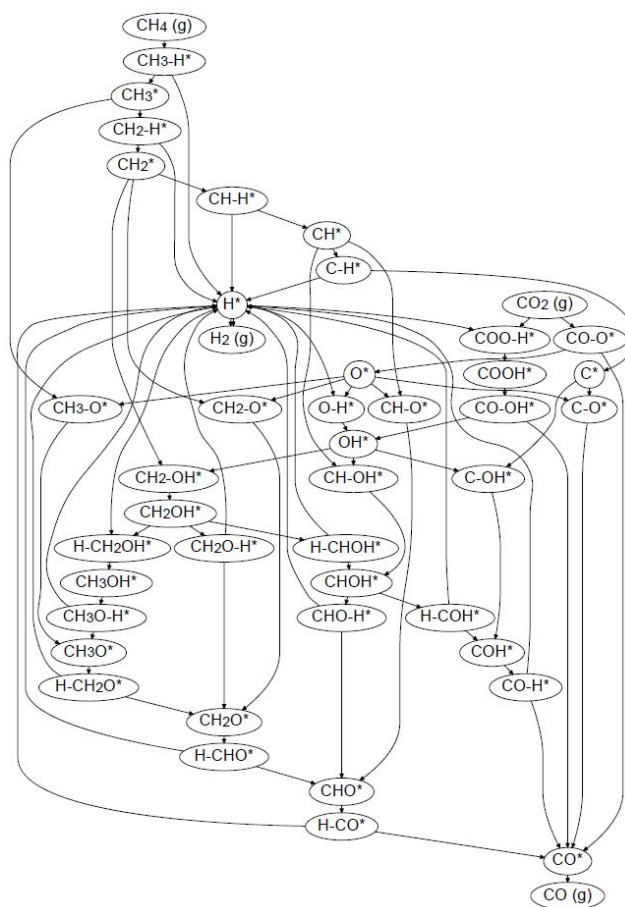

### Iteration 3

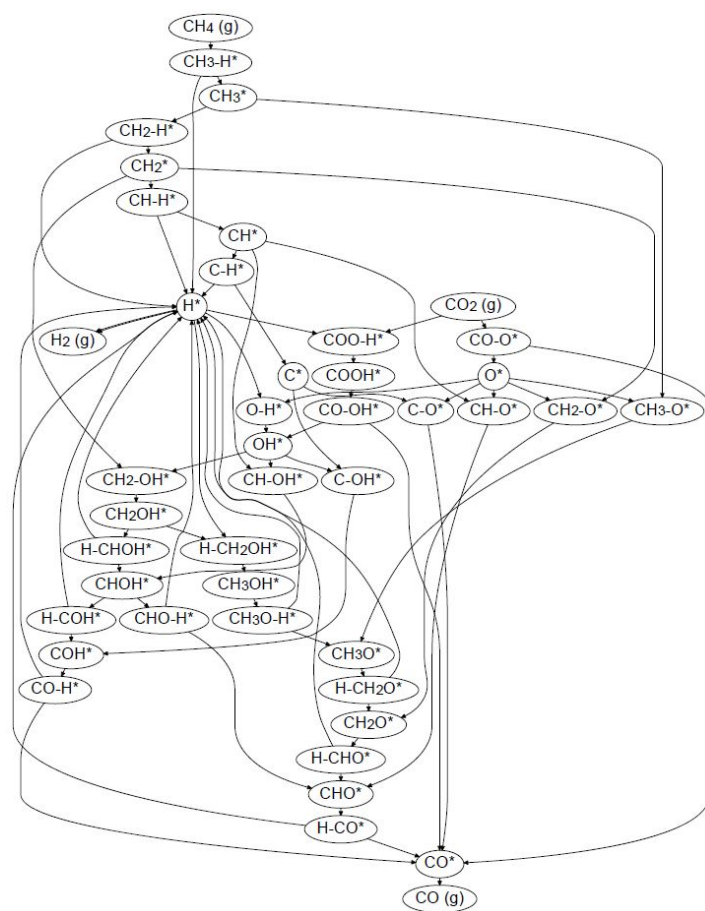

## Iteration 4

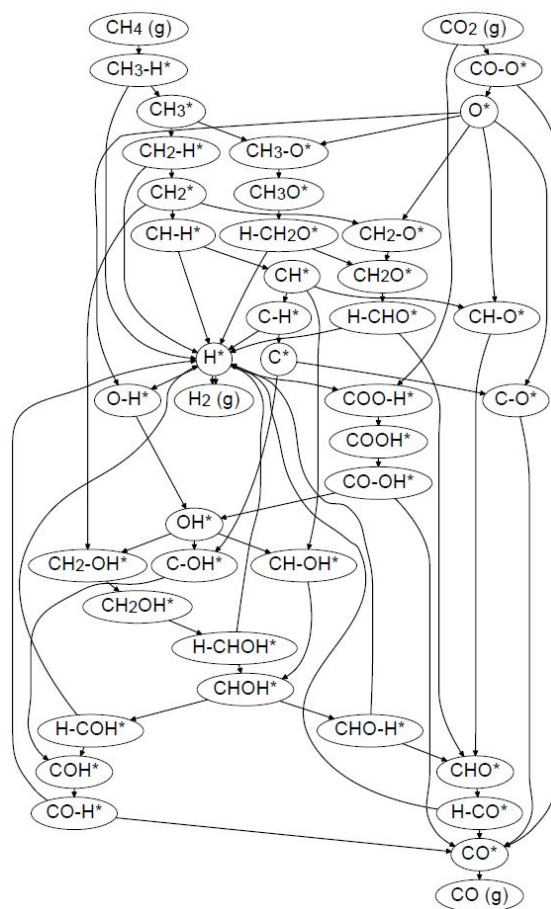

## Iteration 5

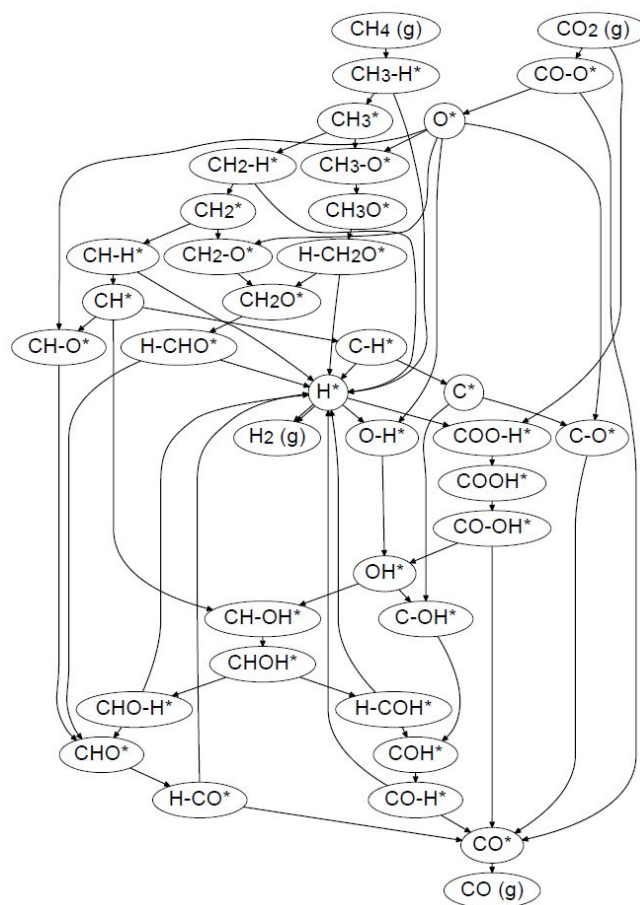



## Iteration 6

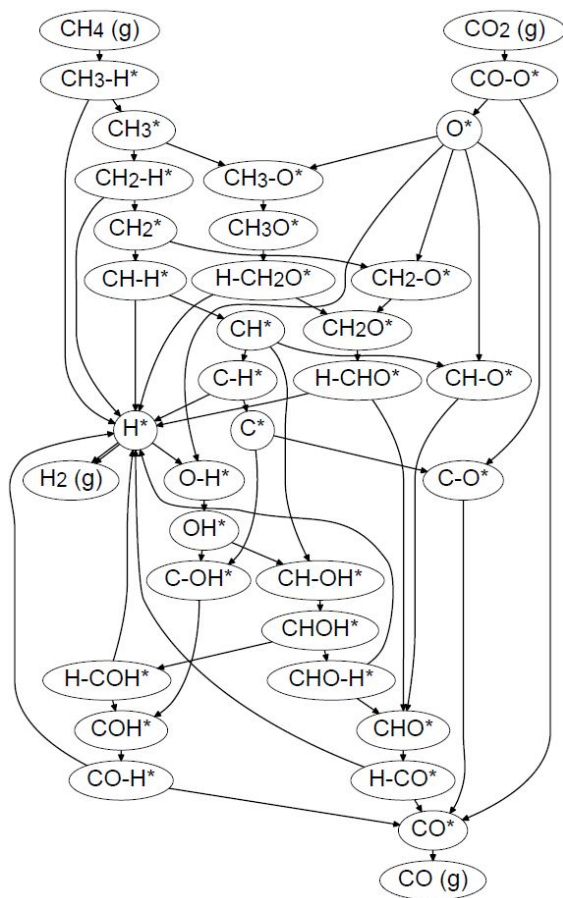

## Iteration 7

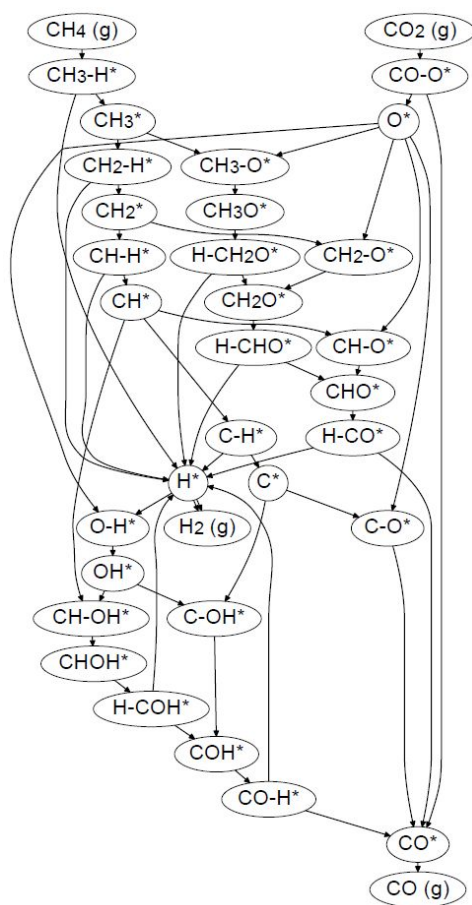

## Iteration 8

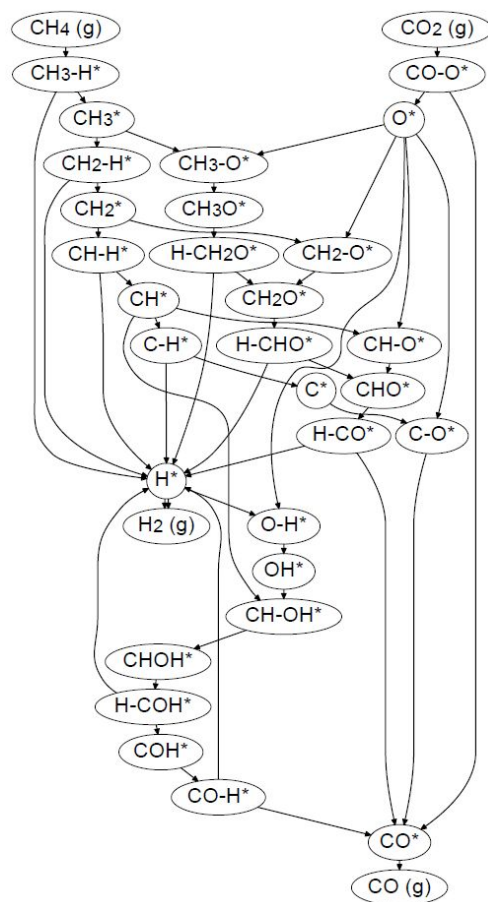

## Iteration 9

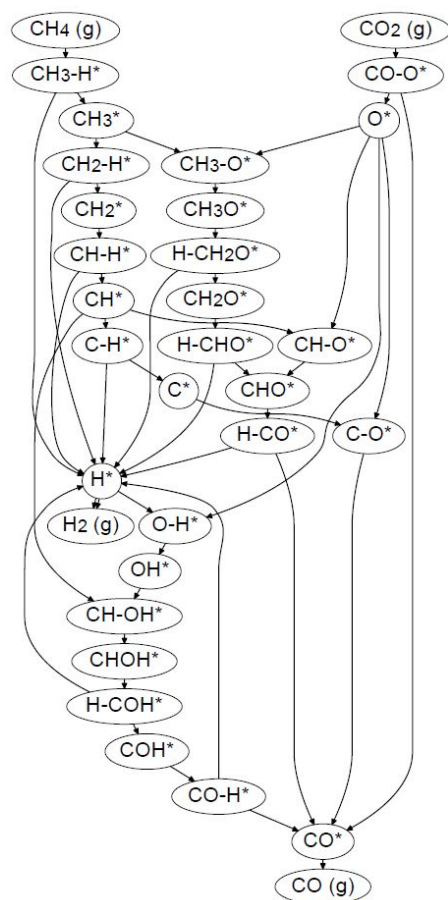

## Iteration 10

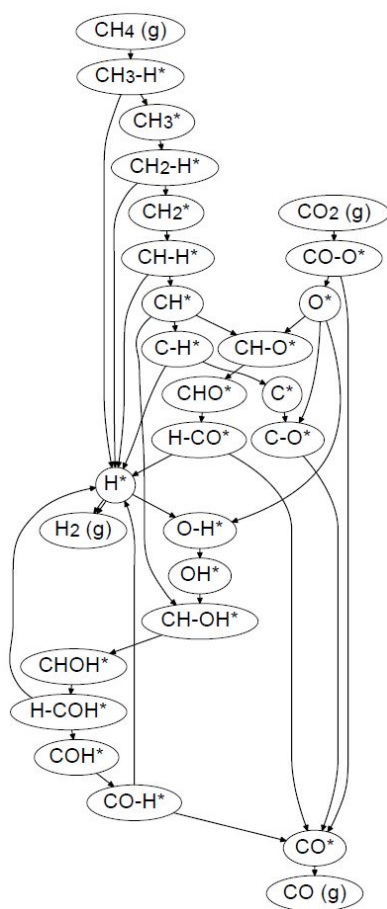

# Iteration 11

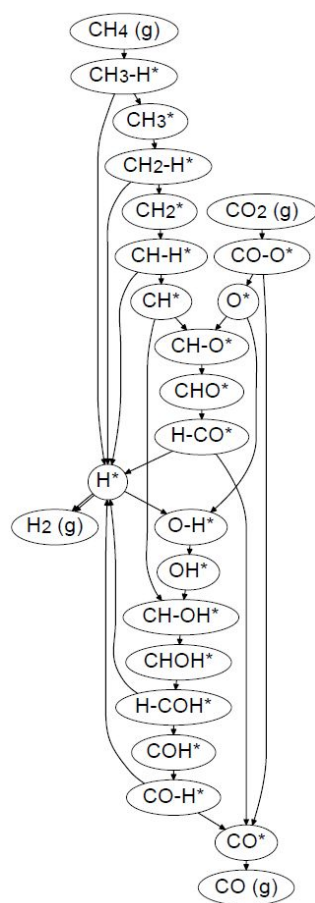

### Iteration 12

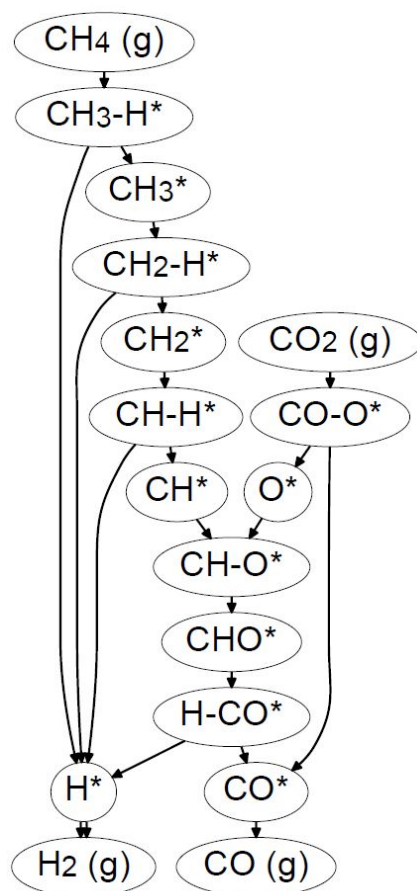

**Figure S7.** DRM reaction network pruning process on 923K, 1 bar, using BEEF-vdw energy on Ni(111).

## References

- (1) Wellendorff, J.; Lundgaard, K. T.; Mogelhoj, A.; Petzold, V.; Landis, D. D.; Nørskov, J. K.; Bligaard, T.; Jacobsen, K. W.: Density functionals for surface science: Exchange-correlation model development with Bayesian error estimation. *Phys. Rev. B* **2012**, *85*, 23.
